# Supplementary material
Source: PubMed Central journal article supplement (PMC3555522)
Supplement: supp_mcs253_mcs253supp.pdf [file supp_mcs253_mcs253supp.pdf]

## SUPPLEMENTARY DATA

TABLE 1. Mean germination proportions ( $\mu$ ), standard deviation (s.d.) and number of replicate Petri dishes ( $n$ ) of all species under the different treatment combinations used in the study. O, open habitat; F, forest; Time, germination response partitioned after census period (1, first incubation; 2, cold stratification; 3, second incubation)

|                               |   | 10°C  |      |      | 15/5°C |      |      | 20°C     |      |      | 25/15°C |      |      | 10°C  |      |      | 15/5°C |      |      | 20°C  |      |      | 25/15°C |      |      |   |      |      |   |      |      |   |      |      |   |      |      |   |
|-------------------------------|---|-------|------|------|--------|------|------|----------|------|------|---------|------|------|-------|------|------|--------|------|------|-------|------|------|---------|------|------|---|------|------|---|------|------|---|------|------|---|------|------|---|
|                               |   | Time  |      |      |        |      |      | Darkness |      |      |         |      |      |       |      |      | Light  |      |      |       |      |      |         |      |      |   |      |      |   |      |      |   |      |      |   |      |      |   |
|                               |   | $\mu$ | s.d. | $n$  | $\mu$  | s.d. | $n$  | $\mu$    | s.d. | $n$  | $\mu$   | s.d. | $n$  | $\mu$ | s.d. | $n$  | $\mu$  | s.d. | $n$  | $\mu$ | s.d. | $n$  | $\mu$   | s.d. | $n$  |   |      |      |   |      |      |   |      |      |   |      |      |   |
| <i>Brachypodium pinnatum</i>  | O | 1     | 0.00 | 0.00 | 5      | 0.00 | 0.01 | 5        | 0.00 | 0.00 | 5       | 0.00 | 0.00 | 5     | 0.00 | 0.01 | 5      | 0.00 | 0.00 | 5     | 0.00 | 0.00 | 5       | 0.00 | 0.00 | 5 | 0.00 | 0.00 | 5 | 0.00 | 0.00 | 5 | 0.00 | 0.00 | 5 | 0.00 | 0.00 | 5 |
|                               |   | 2     | 0.00 | 0.00 | 5      | 0.02 | 0.02 | 5        | 0.00 | 0.00 | 5       | 0.01 | 0.01 | 5     | 0.00 | 0.00 | 5      | 0.00 | 0.00 | 5     | 0.00 | 0.00 | 5       | 0.00 | 0.00 | 5 | 0.00 | 0.00 | 5 | 0.00 | 0.00 | 5 | 0.00 | 0.00 | 5 |      |      |   |
|                               |   | 3     | 0.79 | 0.14 | 5      | 0.86 | 0.07 | 5        | 0.77 | 0.07 | 5       | 0.93 | 0.03 | 5     | 0.82 | 0.05 | 5      | 0.73 | 0.05 | 5     | 0.81 | 0.08 | 5       | 0.81 | 0.04 | 5 | 0.81 | 0.04 | 5 | 0.81 | 0.04 | 5 | 0.81 | 0.04 | 5 |      |      |   |
| <i>sylvaticum</i>             | F | 1     | 0.00 | 0.00 | 5      | 0.00 | 0.00 | 5        | 0.00 | 0.00 | 5       | 0.00 | 0.00 | 5     | 0.00 | 0.00 | 5      | 0.00 | 0.00 | 5     | 0.00 | 0.00 | 5       | 0.00 | 0.00 | 5 | 0.00 | 0.00 | 5 | 0.00 | 0.00 | 5 | 0.00 | 0.00 | 5 |      |      |   |
|                               |   | 2     | 0.00 | 0.00 | 5      | 0.00 | 0.00 | 5        | 0.00 | 0.00 | 5       | 0.00 | 0.01 | 5     | 0.00 | 0.00 | 5      | 0.00 | 0.00 | 5     | 0.00 | 0.00 | 5       | 0.00 | 0.00 | 5 | 0.00 | 0.00 | 5 | 0.00 | 0.00 | 5 | 0.00 | 0.00 | 5 |      |      |   |
|                               |   | 3     | 0.60 | 0.11 | 5      | 0.56 | 0.14 | 5        | 0.50 | 0.04 | 5       | 0.27 | 0.24 | 5     | 0.66 | 0.06 | 5      | 0.60 | 0.09 | 5     | 0.65 | 0.13 | 5       | 0.46 | 0.06 | 5 | 0.46 | 0.06 | 5 | 0.46 | 0.06 | 5 |      |      |   |      |      |   |
| <i>Bromus erectus</i>         | O | 1     | 0.76 | 0.08 | 5      | 0.80 | 0.05 | 5        | 0.77 | 0.05 | 5       | 0.81 | 0.06 | 5     | 0.61 | 0.08 | 5      | 0.63 | 0.03 | 5     | 0.70 | 0.06 | 5       | 0.66 | 0.04 | 5 | 0.66 | 0.04 | 5 | 0.66 | 0.04 | 5 |      |      |   |      |      |   |
|                               |   | 2     | 0.00 | 0.00 | 5      | 0.00 | 0.00 | 5        | 0.00 | 0.00 | 5       | 0.00 | 0.00 | 5     | 0.10 | 0.06 | 5      | 0.06 | 0.04 | 5     | 0.02 | 0.03 | 5       | 0.01 | 0.03 | 5 | 0.01 | 0.03 | 5 |      |      |   |      |      |   |      |      |   |
|                               |   | 3     | 0.00 | 0.00 | 5      | 0.00 | 0.00 | 5        | 0.00 | 0.00 | 5       | 0.00 | 0.00 | 5     | 0.01 | 0.02 | 5      | 0.01 | 0.03 | 5     | 0.01 | 0.01 | 5       | 0.00 | 0.00 | 5 | 0.00 | 0.00 | 5 |      |      |   |      |      |   |      |      |   |
| <i>benekenii</i>              | F | 1     | 0.00 | 0.00 | 5      | 0.08 | 0.04 | 5        | 0.02 | 0.04 | 5       | 0.26 | 0.03 | 2     | 0.00 | 0.00 | 5      | 0.00 | 0.00 | 5     | 0.04 | 0.04 | 5       | 0.04 | 0.04 | 5 | 0.04 | 0.05 | 5 | 0.04 | 0.05 | 5 |      |      |   |      |      |   |
|                               |   | 2     | 0.44 | 0.12 | 5      | 0.42 | 0.18 | 5        | 0.20 | 0.10 | 5       | 0.05 | 0.01 | 2     | 0.49 | 0.09 | 5      | 0.56 | 0.05 | 5     | 0.34 | 0.05 | 5       | 0.15 | 0.05 | 5 | 0.15 | 0.05 | 5 |      |      |   |      |      |   |      |      |   |
|                               |   | 3     | 0.07 | 0.07 | 5      | 0.07 | 0.07 | 5        | 0.06 | 0.03 | 5       | 0.00 | 0.00 | 2     | 0.09 | 0.06 | 5      | 0.08 | 0.02 | 5     | 0.04 | 0.04 | 5       | 0.00 | 0.00 | 5 | 0.00 | 0.00 | 5 |      |      |   |      |      |   |      |      |   |
| <i>Bromus inermis</i>         | O | 1     | 0.38 | 0.07 | 5      | 0.82 | 0.06 | 5        | 0.88 | 0.07 | 5       | 0.89 | 0.05 | 5     | 0.14 | 0.03 | 5      | 0.65 | 0.11 | 5     | 0.75 | 0.08 | 5       | 0.82 | 0.06 | 5 | 0.82 | 0.06 | 5 |      |      |   |      |      |   |      |      |   |
|                               |   | 2     | 0.13 | 0.05 | 5      | 0.03 | 0.03 | 5        | 0.00 | 0.00 | 5       | 0.00 | 0.00 | 5     | 0.16 | 0.06 | 5      | 0.07 | 0.06 | 5     | 0.02 | 0.03 | 5       | 0.00 | 0.00 | 5 | 0.00 | 0.00 | 5 |      |      |   |      |      |   |      |      |   |
|                               |   | 3     | 0.32 | 0.10 | 5      | 0.02 | 0.02 | 5        | 0.00 | 0.00 | 5       | 0.00 | 0.00 | 5     | 0.38 | 0.06 | 5      | 0.16 | 0.05 | 5     | 0.06 | 0.04 | 5       | 0.01 | 0.02 | 5 | 0.01 | 0.02 | 5 |      |      |   |      |      |   |      |      |   |
| <i>ramosus</i>                | F | 1     | 0.03 | 0.02 | 5      | 0.05 | 0.05 | 5        | 0.20 | 0.09 | 5       | 0.66 | 0.09 | 5     | 0.00 | 0.00 | 5      | 0.00 | 0.00 | 5     | 0.25 | 0.17 | 5       | 0.25 | 0.13 | 5 | 0.25 | 0.13 | 5 |      |      |   |      |      |   |      |      |   |
|                               |   | 2     | 0.61 | 0.11 | 5      | 0.60 | 0.12 | 5        | 0.26 | 0.04 | 5       | 0.02 | 0.03 | 5     | 0.61 | 0.11 | 5      | 0.64 | 0.07 | 5     | 0.33 | 0.16 | 5       | 0.21 | 0.14 | 5 | 0.21 | 0.14 | 5 |      |      |   |      |      |   |      |      |   |
|                               |   | 3     | 0.02 | 0.02 | 5      | 0.03 | 0.02 | 5        | 0.07 | 0.05 | 5       | 0.00 | 0.00 | 5     | 0.08 | 0.09 | 5      | 0.06 | 0.04 | 5     | 0.03 | 0.03 | 5       | 0.00 | 0.01 | 5 | 0.00 | 0.01 | 5 |      |      |   |      |      |   |      |      |   |
| <i>Campanula rotundifolia</i> | O | 1     | 0.00 | 0.01 | 5      | 0.16 | 0.08 | 5        | 0.56 | 0.14 | 5       | 0.52 | 0.12 | 3     | 0.25 | 0.37 | 5      | 0.52 | 0.18 | 5     | 0.74 | 0.12 | 5       | 0.63 | 0.07 | 4 | 0.63 | 0.07 | 4 |      |      |   |      |      |   |      |      |   |
|                               |   | 2     | 0.00 | 0.00 | 5      | 0.00 | 0.00 | 5        | 0.00 | 0.00 | 5       | 0.01 | 0.02 | 3     | 0.03 | 0.04 | 5      | 0.04 | 0.08 | 5     | 0.07 | 0.02 | 5       | 0.08 | 0.08 | 4 | 0.08 | 0.08 | 4 |      |      |   |      |      |   |      |      |   |
|                               |   | 3     | 0.06 | 0.04 | 5      | 0.01 | 0.02 | 5        | 0.03 | 0.03 | 5       | 0.00 | 0.00 | 3     | 0.20 | 0.18 | 5      | 0.02 | 0.03 | 5     | 0.01 | 0.01 | 5       | 0.00 | 0.00 | 4 | 0.00 | 0.00 | 4 |      |      |   |      |      |   |      |      |   |
| <i>trachelium</i>             | F | 1     | 0.00 | 0.00 | 5      | 0.00 | 0.00 | 5        | 0.04 | 0.02 | 5       | 0.16 | 0.04 | 4     | 0.00 | 0.00 | 5      | 0.00 | 0.00 | 5     | 0.22 | 0.11 | 5       | 0.21 | 0.09 | 5 | 0.21 | 0.09 | 5 |      |      |   |      |      |   |      |      |   |
|                               |   | 2     | 0.00 | 0.00 | 5      | 0.08 | 0.05 | 5        | 0.00 | 0.00 | 5       | 0.04 | 0.01 | 4     | 0.00 | 0.00 | 5      | 0.00 | 0.00 | 5     | 0.03 | 0.03 | 5       | 0.02 | 0.04 | 5 | 0.02 | 0.04 | 5 |      |      |   |      |      |   |      |      |   |
|                               |   | 3     | 0.32 | 0.08 | 5      | 0.25 | 0.08 | 5        | 0.23 | 0.06 | 5       | 0.26 | 0.03 | 4     | 0.58 | 0.13 | 5      | 0.40 | 0.12 | 5     | 0.29 | 0.17 | 5       | 0.19 | 0.16 | 5 | 0.19 | 0.16 | 5 |      |      |   |      |      |   |      |      |   |
| <i>Carex lepidocarpa</i>      | O | 1     | 0.00 | 0.00 | 5      | 0.00 | 0.00 | 5        | 0.00 | 0.00 | 5       | 0.00 | 0.00 | 5     | 0.00 | 0.00 | 5      | 0.00 | 0.00 | 4     | 0.00 | 0.00 | 5       | 0.02 | 0.03 | 5 | 0.02 | 0.03 | 5 |      |      |   |      |      |   |      |      |   |
|                               |   | 2     | 0.00 | 0.00 | 5      | 0.00 | 0.00 | 5        | 0.00 | 0.00 | 5       | 0.00 | 0.00 | 5     | 0.00 | 0.00 | 5      | 0.00 | 0.00 | 4     | 0.00 | 0.00 | 5       | 0.01 | 0.03 | 5 | 0.01 | 0.03 | 5 |      |      |   |      |      |   |      |      |   |
|                               |   | 3     | 0.02 | 0.03 | 5      | 0.38 | 0.14 | 5        | 0.23 | 0.15 | 5       | 0.40 | 0.05 | 5     | 0.00 | 0.00 | 5      | 0.18 | 0.08 | 4     | 0.18 | 0.13 | 5       | 0.23 | 0.12 | 5 | 0.23 | 0.12 | 5 |      |      |   |      |      |   |      |      |   |
| <i>sylvatica</i>              | F | 1     | 0.00 | 0.00 | 5      | 0.00 | 0.00 | 4        | 0.00 | 0.00 | 5       | 0.00 | 0.00 | 5     | 0.00 | 0.00 | 5      | 0.00 | 0.00 | 5     | 0.00 | 0.00 | 5       | 0.03 | 0.03 | 5 | 0.03 | 0.03 | 5 |      |      |   |      |      |   |      |      |   |
|                               |   | 2     | 0.00 | 0.00 | 5      | 0.00 | 0.00 | 4        | 0.00 | 0.00 | 5       | 0.00 | 0.00 | 5     | 0.03 | 0.07 | 5      | 0.00 | 0.00 | 5     | 0.00 | 0.00 | 5       | 0.06 | 0.05 | 5 | 0.06 | 0.05 | 5 |      |      |   |      |      |   |      |      |   |
|                               |   | 3     | 0.71 | 0.06 | 5      | 0.94 | 0.03 | 4        | 0.57 | 0.03 | 5       | 0.84 | 0.03 | 5     | 0.54 | 0.09 | 5      | 0.91 | 0.03 | 5     | 0.87 | 0.21 | 5       | 0.82 | 0.06 | 5 | 0.82 | 0.06 | 5 |      |      |   |      |      |   |      |      |   |
| <i>Carex ovalis</i>           | O | 1     | 0.00 | 0.00 | 5      | 0.00 | 0.00 | 5        | 0.00 | 0.00 | 5       | 0.00 | 0.00 | 5     | 0.00 | 0.00 | 5      | 0.00 | 0.00 | 5     | 0.11 | 0.05 | 5       | 0.55 | 0.08 | 5 | 0.55 | 0.08 | 5 |      |      |   |      |      |   |      |      |   |
|                               |   | 2     | 0.00 | 0.00 | 5      | 0.00 | 0.00 | 5        | 0.00 | 0.00 | 5       | 0.00 | 0.00 | 5     | 0.00 | 0.00 | 5      | 0.00 | 0.00 | 5     | 0.00 | 0.00 | 5       | 0.06 | 0.06 | 5 | 0.06 | 0.06 | 5 |      |      |   |      |      |   |      |      |   |
|                               |   | 3     | 0.01 | 0.02 | 5      | 0.87 | 0.04 | 5        | 0.20 | 0.09 | 5       | 0.82 | 0.03 | 5     | 0.30 | 0.14 | 5      | 0.88 | 0.09 | 5     | 0.74 | 0.07 | 5       | 0.28 | 0.05 | 5 | 0.28 | 0.05 | 5 |      |      |   |      |      |   |      |      |   |
| <i>remota</i>                 | F | 1     | 0.00 | 0.00 | 5      | 0.00 | 0.00 | 5        | 0.00 | 0.00 | 5       | 0.00 | 0.00 | 5     | 0.00 | 0.00 | 5      | 0.00 | 0.00 | 5     | 0.00 | 0.00 | 5       | 0.00 | 0.00 | 5 | 0.02 | 0.04 | 4 | 0.02 | 0.04 | 4 |      |      |   |      |      |   |
|                               |   | 2     | 0.00 | 0.00 | 5      | 0.00 | 0.00 | 5        | 0.00 | 0.00 | 5       | 0.00 | 0.00 | 5     | 0.00 | 0.00 | 5      | 0.00 | 0.00 | 5     | 0.00 | 0.00 | 5       | 0.00 | 0.00 | 5 | 0.05 | 0.07 | 4 | 0.05 | 0.07 | 4 |      |      |   |      |      |   |
|                               |   | 3     | 0.00 | 0.00 | 5      | 0.06 | 0.03 | 5        | 0.03 | 0.03 | 5       | 0.46 | 0.23 | 5     | 0.28 | 0.24 | 5      | 0.89 | 0.04 | 5     | 0.72 | 0.30 | 5       | 0.80 | 0.09 | 4 | 0.80 | 0.09 | 4 |      |      |   |      |      |   |      |      |   |
| <i>Festuca arundinacea</i>    | O | 1     | 0.01 | 0.01 | 5      | 0.41 | 0.05 | 5        | 0.81 | 0.07 | 5       | 0.81 | 0.06 | 5     | 0.08 | 0.09 | 5      | 0.52 | 0.18 | 5     | 0.86 | 0.04 | 5       | 0.80 | 0.09 | 5 | 0.80 | 0.09 | 5 |      |      |   |      |      |   |      |      |   |

|  |                   |                     |   |      |      |      |      |      |      |      |      |      |      |      |      |      |      |      |      |      |      |      |      |      |      |      |      |   |
|--|-------------------|---------------------|---|------|------|------|------|------|------|------|------|------|------|------|------|------|------|------|------|------|------|------|------|------|------|------|------|---|
|  |                   |                     | 2 | 0.00 | 0.00 | 5    | 0.01 | 0.02 | 5    | 0.00 | 0.01 | 5    | 0.00 | 0.01 | 5    | 0.06 | 0.03 | 5    | 0.25 | 0.13 | 5    | 0.02 | 0.02 | 5    | 0.01 | 0.02 | 5    |   |
|  |                   |                     | 3 | 0.79 | 0.05 | 5    | 0.37 | 0.07 | 5    | 0.01 | 0.02 | 5    | 0.02 | 0.03 | 5    | 0.70 | 0.13 | 5    | 0.13 | 0.09 | 5    | 0.01 | 0.02 | 5    | 0.01 | 0.03 | 5    |   |
|  |                   | <i>altissima</i>    | F | 1    | 0.00 | 0.00 | 5    | 0.00 | 0.01 | 5    | 0.00 | 0.00 | 5    | 0.00 | 0.01 | 5    | 0.00 | 0.00 | 5    | 0.01 | 0.01 | 4    | 0.00 | 0.00 | 5    | 0.00 | 0.00 | 5 |
|  |                   |                     | 2 | 0.00 | 0.01 | 5    | 0.00 | 0.01 | 5    | 0.00 | 0.00 | 5    | 0.02 | 0.04 | 5    | 0.00 | 0.00 | 5    | 0.01 | 0.01 | 4    | 0.00 | 0.00 | 5    | 0.00 | 0.01 | 5    |   |
|  |                   |                     | 3 | 0.54 | 0.11 | 5    | 0.54 | 0.10 | 5    | 0.30 | 0.12 | 5    | 0.39 | 0.14 | 5    | 0.67 | 0.10 | 5    | 0.56 | 0.04 | 4    | 0.36 | 0.14 | 5    | 0.33 | 0.12 | 5    |   |
|  | <i>Festuca</i>    | <i>pratensis</i>    | O | 1    | 0.76 | 0.03 | 5    | 0.82 | 0.06 | 5    | 0.93 | 0.04 | 5    | 0.97 | 0.01 | 5    | 0.22 | 0.24 | 5    | 0.47 | 0.16 | 5    | 0.84 | 0.06 | 5    | 0.73 | 0.11 | 5 |
|  |                   |                     | 2 | 0.10 | 0.03 | 5    | 0.01 | 0.02 | 5    | 0.01 | 0.01 | 5    | 0.00 | 0.00 | 5    | 0.23 | 0.13 | 5    | 0.09 | 0.10 | 5    | 0.02 | 0.02 | 5    | 0.08 | 0.06 | 5    |   |
|  |                   |                     | 3 | 0.09 | 0.01 | 5    | 0.08 | 0.02 | 5    | 0.02 | 0.00 | 5    | 0.00 | 0.01 | 5    | 0.50 | 0.13 | 5    | 0.30 | 0.16 | 5    | 0.00 | 0.01 | 5    | 0.01 | 0.02 | 5    |   |
|  |                   | <i>gigantea</i>     | F | 1    | 0.00 | 0.00 | 5    | 0.00 | 0.00 | 5    | 0.00 | 0.00 | 5    | 0.00 | 0.00 | 5    | 0.00 | 0.00 | 5    | 0.00 | 0.00 | 5    | 0.02 | 0.05 | 5    | 0.52 | 0.08 | 5 |
|  |                   |                     | 2 | 0.00 | 0.01 | 5    | 0.02 | 0.02 | 5    | 0.00 | 0.00 | 5    | 0.16 | 0.09 | 5    | 0.01 | 0.02 | 5    | 0.00 | 0.00 | 5    | 0.05 | 0.04 | 5    | 0.19 | 0.06 | 5    |   |
|  |                   |                     | 3 | 0.94 | 0.03 | 5    | 0.94 | 0.02 | 5    | 0.96 | 0.01 | 5    | 0.82 | 0.10 | 5    | 0.92 | 0.03 | 5    | 0.95 | 0.04 | 5    | 0.89 | 0.11 | 5    | 0.23 | 0.11 | 5    |   |
|  | <i>Geum</i>       | <i>rivale</i>       | O | 1    | 0.00 | 0.00 | 5    | 0.00 | 0.00 | 5    | 0.01 | 0.01 | 5    | 0.04 | 0.03 | 5    | 0.00 | 0.01 | 5    | 0.00 | 0.00 | 5    | 0.36 | 0.11 | 5    | 0.80 | 0.06 | 5 |
|  |                   |                     | 2 | 0.00 | 0.00 | 5    | 0.00 | 0.00 | 5    | 0.00 | 0.00 | 5    | 0.00 | 0.00 | 5    | 0.00 | 0.00 | 5    | 0.03 | 0.07 | 5    | 0.00 | 0.00 | 5    | 0.00 | 0.00 | 5    |   |
|  |                   |                     | 3 | 0.66 | 0.10 | 5    | 0.90 | 0.06 | 5    | 0.56 | 0.10 | 5    | 0.80 | 0.03 | 5    | 0.74 | 0.04 | 5    | 0.89 | 0.06 | 5    | 0.47 | 0.09 | 5    | 0.10 | 0.06 | 5    |   |
|  |                   | <i>urbanum</i>      | F | 1    | 0.00 | 0.00 | 5    | 0.00 | 0.00 | 5    | 0.14 | 0.04 | 5    | 0.08 | 0.06 | 5    | 0.00 | 0.00 | 5    | 0.02 | 0.02 | 5    | 0.20 | 0.09 | 5    | 0.49 | 0.11 | 5 |
|  |                   |                     | 2 | 0.00 | 0.00 | 5    | 0.01 | 0.02 | 5    | 0.01 | 0.01 | 5    | 0.00 | 0.00 | 5    | 0.00 | 0.00 | 5    | 0.03 | 0.04 | 5    | 0.06 | 0.04 | 5    | 0.12 | 0.06 | 5    |   |
|  |                   |                     | 3 | 0.08 | 0.04 | 5    | 0.41 | 0.06 | 5    | 0.14 | 0.07 | 5    | 0.23 | 0.08 | 5    | 0.61 | 0.10 | 5    | 0.66 | 0.08 | 5    | 0.52 | 0.09 | 5    | 0.16 | 0.03 | 5    |   |
|  | <i>Hordeum</i>    | <i>murinum</i>      | O | 1    | 0.93 | 0.04 | 5    | 0.91 | 0.02 | 5    | 0.96 | 0.05 | 5    | 0.89 | 0.07 | 5    | 0.47 | 0.06 | 5    | 0.59 | 0.06 | 5    | 0.69 | 0.04 | 5    | 0.57 | 0.12 | 5 |
|  |                   |                     | 2 | 0.01 | 0.02 | 5    | 0.01 | 0.01 | 5    | 0.01 | 0.02 | 5    | 0.00 | 0.00 | 5    | 0.44 | 0.08 | 5    | 0.29 | 0.08 | 5    | 0.19 | 0.06 | 5    | 0.28 | 0.10 | 5    |   |
|  |                   |                     | 3 | 0.00 | 0.00 | 5    | 0.00 | 0.00 | 5    | 0.00 | 0.00 | 5    | 0.00 | 0.00 | 5    | 0.00 | 0.00 | 5    | 0.00 | 0.00 | 5    | 0.01 | 0.01 | 5    | 0.01 | 0.01 | 5    |   |
|  | <i>Hordelymus</i> | <i>europaeus</i>    | F | 1    | 0.00 | 0.00 | 5    | 0.08 | 0.04 | 5    | 0.14 | 0.06 | 5    | 0.17 | 0.13 | 4    | 0.00 | 0.00 | 5    | 0.00 | 0.00 | 5    | 0.00 | 0.00 | 5    | 0.03 | 0.05 | 5 |
|  |                   |                     | 2 | 0.17 | 0.07 | 5    | 0.00 | 0.01 | 5    | 0.18 | 0.06 | 5    | 0.05 | 0.04 | 4    | 0.32 | 0.12 | 5    | 0.26 | 0.10 | 5    | 0.33 | 0.12 | 5    | 0.27 | 0.13 | 5    |   |
|  |                   |                     | 3 | 0.02 | 0.02 | 5    | 0.02 | 0.02 | 5    | 0.01 | 0.03 | 5    | 0.03 | 0.04 | 4    | 0.05 | 0.04 | 5    | 0.04 | 0.09 | 5    | 0.02 | 0.03 | 5    | 0.02 | 0.02 | 5    |   |
|  | <i>Hypericum</i>  | <i>perforatum</i>   | O | 1    | 0.00 | 0.00 | 5    | 0.00 | 0.00 | 5    | 0.05 | 0.02 | 5    | 0.20 | 0.06 | 5    | 0.02 | 0.04 | 5    | 0.40 | 0.29 | 5    | 0.35 | 0.42 | 5    | 0.32 | 0.39 | 4 |
|  |                   |                     | 2 | 0.00 | 0.00 | 5    | 0.00 | 0.00 | 5    | 0.00 | 0.00 | 5    | 0.00 | 0.00 | 5    | 0.01 | 0.02 | 5    | 0.14 | 0.23 | 5    | 0.00 | 0.01 | 5    | 0.00 | 0.00 | 4    |   |
|  |                   |                     | 3 | 0.07 | 0.09 | 5    | 0.24 | 0.06 | 5    | 0.04 | 0.08 | 5    | 0.14 | 0.09 | 5    | 0.56 | 0.20 | 5    | 0.26 | 0.19 | 5    | 0.51 | 0.35 | 5    | 0.47 | 0.32 | 4    |   |
|  |                   | <i>hirsutum</i>     | F | 1    | 0.00 | 0.00 | 5    | 0.00 | 0.00 | 5    | 0.00 | 0.00 | 5    | 0.00 | 0.00 | 5    | 0.00 | 0.00 | 5    | 0.00 | 0.00 | 5    | 0.07 | 0.13 | 5    | 0.23 | 0.31 | 5 |
|  |                   |                     | 2 | 0.00 | 0.00 | 5    | 0.00 | 0.00 | 5    | 0.00 | 0.00 | 5    | 0.00 | 0.00 | 5    | 0.00 | 0.00 | 5    | 0.00 | 0.00 | 5    | 0.00 | 0.01 | 5    | 0.08 | 0.12 | 5    |   |
|  |                   |                     | 3 | 0.00 | 0.00 | 5    | 0.68 | 0.13 | 5    | 0.48 | 0.30 | 5    | 0.83 | 0.07 | 5    | 0.26 | 0.20 | 5    | 0.34 | 0.24 | 5    | 0.77 | 0.09 | 5    | 0.38 | 0.41 | 5    |   |
|  | <i>Poa</i>        | <i>pratensis</i>    | O | 1    | 0.54 | 0.08 | 5    | 0.89 | 0.04 | 5    | 0.66 | 0.03 | 5    | 0.72 | 0.07 | 3    | 0.32 | 0.07 | 5    | 0.32 | 0.11 | 5    | 0.63 | 0.10 | 5    | 0.76 | 0.08 | 5 |
|  |                   |                     | 2 | 0.07 | 0.04 | 5    | 0.02 | 0.03 | 5    | 0.00 | 0.01 | 5    | 0.00 | 0.00 | 3    | 0.33 | 0.09 | 5    | 0.18 | 0.09 | 5    | 0.06 | 0.07 | 5    | 0.02 | 0.03 | 5    |   |
|  |                   |                     | 3 | 0.07 | 0.04 | 5    | 0.00 | 0.01 | 5    | 0.01 | 0.01 | 5    | 0.01 | 0.02 | 3    | 0.15 | 0.09 | 5    | 0.14 | 0.05 | 5    | 0.13 | 0.08 | 5    | 0.02 | 0.02 | 5    |   |
|  |                   | <i>nemoralis</i>    | F | 1    | 0.10 | 0.03 | 5    | 0.72 | 0.08 | 5    | 0.24 | 0.09 | 5    | 0.37 | 0.07 | 4    | 0.04 | 0.06 | 5    | 0.15 | 0.11 | 5    | 0.49 | 0.21 | 5    | 0.59 | 0.32 | 5 |
|  |                   |                     | 2 | 0.01 | 0.01 | 5    | 0.01 | 0.01 | 5    | 0.00 | 0.00 | 5    | 0.00 | 0.00 | 4    | 0.07 | 0.04 | 5    | 0.06 | 0.02 | 5    | 0.05 | 0.02 | 5    | 0.01 | 0.02 | 5    |   |
|  |                   |                     | 3 | 0.27 | 0.07 | 5    | 0.06 | 0.02 | 5    | 0.03 | 0.03 | 5    | 0.18 | 0.04 | 4    | 0.59 | 0.09 | 5    | 0.44 | 0.16 | 5    | 0.10 | 0.08 | 5    | 0.04 | 0.03 | 5    |   |
|  | <i>Primula</i>    | <i>farinosa</i>     | O | 1    | 0.00 | 0.00 | 5    | 0.00 | 0.00 | 5    | 0.00 | 0.00 | 5    | 0.00 | 0.00 | 5    | 0.00 | 0.00 | 5    | 0.00 | 0.00 | 5    | 0.00 | 0.01 | 5    | 0.10 | 0.10 | 5 |
|  |                   |                     | 2 | 0.00 | 0.00 | 5    | 0.00 | 0.00 | 5    | 0.00 | 0.00 | 5    | 0.00 | 0.00 | 5    | 0.00 | 0.00 | 5    | 0.00 | 0.00 | 5    | 0.01 | 0.01 | 5    | 0.01 | 0.01 | 5    |   |
|  |                   |                     | 3 | 0.00 | 0.00 | 5    | 0.01 | 0.02 | 5    | 0.01 | 0.01 | 5    | 0.00 | 0.01 | 5    | 0.09 | 0.09 | 5    | 0.45 | 0.29 | 5    | 0.72 | 0.14 | 5    | 0.29 | 0.40 | 5    |   |
|  |                   | <i>elatior</i>      | F | 1    | 0.00 | 0.01 | 5    | 0.10 | 0.02 | 5    | 0.00 | 0.01 | 5    | 0.00 | 0.00 | 5    | 0.00 | 0.00 | 5    | 0.00 | 0.00 | 5    | 0.02 | 0.02 | 5    | 0.02 | 0.02 | 5 |
|  |                   |                     | 2 | 0.06 | 0.03 | 5    | 0.11 | 0.04 | 5    | 0.19 | 0.06 | 5    | 0.11 | 0.08 | 5    | 0.09 | 0.13 | 5    | 0.22 | 0.10 | 5    | 0.02 | 0.01 | 5    | 0.08 | 0.11 | 5    |   |
|  |                   |                     | 3 | 0.08 | 0.02 | 5    | 0.12 | 0.06 | 5    | 0.10 | 0.03 | 5    | 0.10 | 0.05 | 5    | 0.10 | 0.06 | 5    | 0.11 | 0.05 | 5    | 0.58 | 0.15 | 5    | 0.34 | 0.14 | 5    |   |
|  | <i>Rumex</i>      | <i>obtusifolius</i> | O | 1    | 0.02 | 0.02 | 5    | 0.10 | 0.10 | 5    | 0.83 | 0.06 | 5    | 0.81 | 0.04 | 5    | 0.01 | 0.03 | 5    | 0.78 | 0.07 | 5    | 0.72 | 0.12 | 5    | 0.89 | 0.08 | 5 |
|  |                   |                     | 2 | 0.01 | 0.02 | 5    | 0.02 | 0.04 | 5    | 0.00 | 0.01 | 5    | 0.08 | 0.02 | 5    | 0.41 | 0.17 | 5    | 0.05 | 0.03 | 5    | 0.08 | 0.07 | 5    | 0.02 | 0.04 | 5    |   |
|  |                   |                     | 3 | 0.45 | 0.06 | 5    | 0.37 | 0.11 | 5    | 0.12 | 0.06 | 5    | 0.11 | 0.02 | 5    | 0.42 | 0.16 | 5    | 0.10 | 0.11 | 5    | 0.10 | 0.12 | 5    | 0.00 | 0.00 | 5    |   |
|  |                   | <i>sanguineus</i>   | F | 1    | 0.01 | 0.01 | 5    | 0.12 | 0.07 | 5    | 0.09 | 0.02 | 5    | 0.26 | 0.06 | 5    | 0.02 | 0.02 | 5    | 0.80 | 0.15 | 5    | 0.28 | 0.19 | 5    | 0.93 | 0.03 | 5 |
|  |                   |                     | 2 | 0.11 | 0.04 | 5    | 0.00 | 0.00 | 5    | 0.01 | 0.01 | 5    | 0.00 | 0.00 | 5    | 0.35 | 0.09 | 5    | 0.08 | 0.10 | 5    | 0.04 | 0.05 | 5    | 0.00 | 0.01 | 5    |   |
|  |                   |                     | 3 | 0.30 | 0.07 | 5    | 0.54 | 0.12 | 5    | 0.32 | 0.04 | 5    | 0.39 | 0.04 | 5    | 0.58 | 0.11 | 5    | 0.10 | 0.10 | 5    | 0.52 | 0.17 | 5    | 0.02 | 0.04 | 5    |   |
|  | <i>Silene</i>     | <i>latifolia</i>    | O | 1    | 0.17 | 0.07 | 5    | 0.44 | 0.07 | 5    | 0.44 | 0.08 | 5    | 0.82 | 0.06 | 5    | 0.12 | 0.05 | 5    | 0.69 | 0.09 | 5    | 0.61 | 0.07 | 5    | 0.77 | 0.13 | 5 |
|  |                   |                     | 2 | 0.06 | 0.03 | 5    | 0.05 | 0.03 | 5    | 0.08 | 0.04 | 5    | 0.02 | 0.01 | 5    | 0.00 | 0.00 | 5    | 0.02 | 0.04 | 5    | 0.02 | 0.01 | 5    | 0.00 | 0.01 | 5    |   |

|                  |                 |   |   |      |      |   |      |      |   |      |      |   |      |      |   |      |      |   |      |      |   |      |      |   |      |      |   |
|------------------|-----------------|---|---|------|------|---|------|------|---|------|------|---|------|------|---|------|------|---|------|------|---|------|------|---|------|------|---|
|                  |                 |   | 3 | 0.22 | 0.12 | 5 | 0.07 | 0.06 | 5 | 0.10 | 0.07 | 5 | 0.03 | 0.03 | 5 | 0.17 | 0.03 | 5 | 0.07 | 0.06 | 5 | 0.05 | 0.04 | 5 | 0.03 | 0.04 | 5 |
|                  | <i>dioica</i>   | F | 1 | 0.00 | 0.00 | 5 | 0.06 | 0.04 | 5 | 0.06 | 0.03 | 5 | 0.24 | 0.02 | 5 | 0.01 | 0.01 | 5 | 0.26 | 0.12 | 5 | 0.50 | 0.10 | 5 | 0.61 | 0.21 | 5 |
|                  |                 |   | 2 | 0.11 | 0.06 | 5 | 0.65 | 0.07 | 5 | 0.30 | 0.10 | 5 | 0.65 | 0.07 | 5 | 0.02 | 0.02 | 5 | 0.06 | 0.03 | 5 | 0.08 | 0.03 | 5 | 0.03 | 0.02 | 5 |
|                  |                 |   | 3 | 0.80 | 0.07 | 5 | 0.21 | 0.03 | 5 | 0.49 | 0.08 | 5 | 0.09 | 0.05 | 5 | 0.71 | 0.09 | 5 | 0.29 | 0.06 | 5 | 0.24 | 0.07 | 5 | 0.20 | 0.12 | 5 |
| <i>Stellaria</i> | <i>graminea</i> | O | 1 | 0.09 | 0.04 | 5 | 0.28 | 0.06 | 5 | 0.46 | 0.08 | 5 | 0.75 | 0.07 | 2 | 0.16 | 0.25 | 5 | 0.46 | 0.28 | 5 | 0.26 | 0.30 | 5 | 0.42 | 0.25 | 5 |
|                  |                 |   | 2 | 0.03 | 0.03 | 5 | 0.00 | 0.00 | 5 | 0.02 | 0.04 | 5 | 0.09 | 0.04 | 2 | 0.07 | 0.05 | 5 | 0.09 | 0.07 | 5 | 0.06 | 0.01 | 5 | 0.10 | 0.07 | 5 |
|                  |                 |   | 3 | 0.02 | 0.03 | 5 | 0.06 | 0.06 | 5 | 0.02 | 0.02 | 5 | 0.00 | 0.00 | 2 | 0.16 | 0.11 | 5 | 0.05 | 0.10 | 5 | 0.06 | 0.06 | 5 | 0.04 | 0.05 | 5 |
|                  | <i>holostea</i> | F | 1 | 0.07 | 0.04 | 5 | 0.10 | 0.06 | 5 | 0.00 | 0.00 | 5 | 0.13 | 0.03 | 5 | 0.00 | 0.00 | 5 | 0.00 | 0.00 | 5 | 0.00 | 0.00 | 5 | 0.01 | 0.02 | 5 |
|                  |                 |   | 2 | 0.15 | 0.06 | 5 | 0.14 | 0.10 | 5 | 0.01 | 0.03 | 5 | 0.26 | 0.14 | 5 | 0.05 | 0.06 | 5 | 0.11 | 0.08 | 5 | 0.11 | 0.18 | 5 | 0.37 | 0.15 | 5 |
|                  |                 |   | 3 | 0.12 | 0.06 | 5 | 0.14 | 0.14 | 5 | 0.06 | 0.05 | 5 | 0.07 | 0.05 | 5 | 0.25 | 0.11 | 5 | 0.17 | 0.04 | 5 | 0.10 | 0.08 | 5 | 0.01 | 0.03 | 5 |
| <i>Stellaria</i> | <i>media</i>    | O | 1 | 0.13 | 0.09 | 5 | 0.13 | 0.03 | 4 | 0.21 | 0.06 | 5 | 0.42 | 0.11 | 2 | 0.06 | 0.08 | 5 | 0.16 | 0.07 | 5 | 0.13 | 0.04 | 5 | 0.21 | 0.04 | 5 |
|                  |                 |   | 2 | 0.01 | 0.01 | 5 | 0.00 | 0.00 | 4 | 0.00 | 0.01 | 5 | 0.04 | 0.06 | 2 | 0.02 | 0.03 | 5 | 0.06 | 0.05 | 5 | 0.04 | 0.03 | 5 | 0.10 | 0.08 | 5 |
|                  |                 |   | 3 | 0.02 | 0.02 | 5 | 0.01 | 0.01 | 4 | 0.04 | 0.02 | 5 | 0.01 | 0.01 | 2 | 0.04 | 0.04 | 5 | 0.05 | 0.03 | 5 | 0.02 | 0.02 | 5 | 0.00 | 0.00 | 5 |
|                  | <i>nemorum</i>  | F | 1 | 0.01 | 0.01 | 5 | 0.01 | 0.01 | 5 | 0.01 | 0.01 | 5 | 0.04 | 0.02 | 5 | 0.00 | 0.00 | 5 | 0.00 | 0.00 | 5 | 0.05 | 0.07 | 5 | 0.37 | 0.11 | 5 |
|                  |                 |   | 2 | 0.09 | 0.06 | 5 | 0.27 | 0.04 | 5 | 0.01 | 0.01 | 5 | 0.27 | 0.09 | 5 | 0.01 | 0.02 | 5 | 0.00 | 0.01 | 5 | 0.06 | 0.06 | 5 | 0.07 | 0.07 | 5 |
|                  |                 |   | 3 | 0.02 | 0.03 | 5 | 0.04 | 0.03 | 5 | 0.01 | 0.02 | 5 | 0.03 | 0.02 | 5 | 0.12 | 0.10 | 5 | 0.07 | 0.03 | 5 | 0.19 | 0.10 | 5 | 0.01 | 0.02 | 5 |
